# Supplementary material for: dJun and Vri/dNFIL3 Are Major Regulators of Cardiac Aging in Drosophila
Source: PLoS Genet. 2012 Nov 29;8(11):e1003081. doi: 10.1371/journal.pgen.1003081 (PMC3510041; doi:10.1371/journal.pgen.1003081)
Supplement: Table S9 — (Related to Table 1.) Comparison of the set of up-regulated genes with JNK-pathway-responsive genes. JNK pathway-dependent genes modulated following innate immune challenge were identified in two studies on Drosophila S2 cells [17], [18]. Cluster 2 genes also found among Hemipterous (hep, the JNK MAP kinase-Kinase)-dependent genes = and/or Basket (bsk, the JNK MAP kinase)-dependent genes = following Lipo-polysaccharide challenge are listed. Hep- and Bsk-dependent genes represent a total of 133 non redundant genes, of which 29 are present in cluster 2 (p<10−7 see Table 1). (XLSX) [file pgen.1003081.s015.xlsx]

## Sheet: Table S9
Table S9 (related to Table 1): Comparison of the set of up-regulated genes with JNK-pathway-responsive genes.
FB_ID	Symbol	annotation_ID	FC	Cluster heart	Cluster bsk	Cluster hep
FBgn0001291	Jra	CG2275	1.72653	2	1	1
FBgn0014380	RhoL	CG9366	2.04362	2	1	1
FBgn0014141	cher	CG3937	2.93726	2	1
FBgn0038638	CG7702	CG7702	2.48287	2	1
FBgn0038721	CG16718	CG16718	3.01753	2		1
FBgn0026378	Rep	CG8432	2.29497	2		1
FBgn0032140	CG13117	CG13117	1.96538	2		1
FBgn0025865	Cortactin	CG3637	2.82531	2		1
FBgn0034583	CG10527	CG10527	2.36447	2		1
FBgn0028341	l(1)G0232	CG32697	2.2876	2		1
FBgn0024980	Syx4	CG2715	1.92321	2		1
FBgn0086347	Myo31DF	CG7438	2.54002	2		1
FBgn0033786	CG3884	CG3884	6.01113	2		1
FBgn0014011	Rac2	CG8556	2.14025	2		1
FBgn0031888	Pvf2	CG13780	2.3237	2		1
FBgn0035049	Mmp1	CG4859	3.11544	2		1
FBgn0086656	shrb	CG8055	1.99311	2		1
FBgn0043841	vir-1	CG31764	3.21509	2		1
FBgn0000083	AnnIX	CG5730	2.5192	2		1
FBgn0040475	SH3PX1	CG6757	1.82694	2	1	1
FBgn0029131	debcl	CG33134	2.52489	2	1
FBgn0013343	Syx1A	CG31136	2.34005	2	1
FBgn0035589	CHMP2B	CG4618	1.85107	2	1
FBgn0036805	Chmp1	CG4108	1.9567	2	1
FBgn0041182	TepII	CG7052	2.50428	2		1
FBgn0030048	CG12112	CG12112	2.50445	2		1
FBgn0032451	spict	CG12292	2.14338	2		1
FBgn0036101	NijA	CG6449	1.97696	2		1
FBgn0036333	MICAL-like	CG11259	1.85947	2		1
FBgn0052380	SMSr	CG32380	0.524399	1	1
FBgn0011817	nmo	CG7892	0.573774	1	1
Bold: Genes with AP1 sites in promoter
