# Supplementary material for: dJun and Vri/dNFIL3 Are Major Regulators of Cardiac Aging in Drosophila
Source: PLoS Genet. 2012 Nov 29;8(11):e1003081. doi: 10.1371/journal.pgen.1003081 (PMC3510041; doi:10.1371/journal.pgen.1003081)
Supplement: Table S14 — (Related to Table 3.) Genes repressed upon dJun knockdown. Genes down regulated in HandGS/UAS>dJun-IR cardiac tubes from 40 days old flies fed on RU486 containing food compared to cardiac tubes of the same genotype and age fed on food not containing RU486 are listed. FlyBase unique identifier (FB ID), gene symbol and computer gene numbers (annotation ID) are indicated. For each gene, the mean value of the fold change () and the corrected P value, as calculated using Rank Product software (see Experimental procedure) are indicated. (XLSX) [file pgen.1003081.s020.xlsx]

## Sheet: Table S14
Table S14 : Genes downregulated upon cardiac dJun knockdown at 40 days .
FB-ID	annotation_ID	Symbol	<FC>	Corrected Pval (min)
FBgn0040096	CG16834	lectin-33A	307.56	0.0
FBgn0025686	CG11592	CG11592	105.908	0.0
FBgn0052702	CG32702	CG32702	89.5042	0.0
FBgn0036169	CG6128	Fuca	47.8521	0.0
FBgn0053296	CG33296	CG33296	46.8561	0.0
FBgn0033724	CG8501	CG8501	40.3258	0.0
FBgn0033137	CG4471	Tsp42Ep	24.083	2.2522015E-7
FBgn0031935	CG13793	CG13793	23.0943	2.2522015E-7
FBgn0259140	CG42255	CG42255	20.3884	2.2522015E-7
FBgn0030237	CG15209	CG15209	18.7202	2.2522015E-7
FBgn0004426	CG9111	LysC	12.8527	1.3287989E-5
FBgn0004427	CG9118	LysD	12.7105	1.0360127E-5
FBgn0002985	CG3851	odd	12.0812	4.504403E-7
FBgn0027537	CG11092	CG11092	11.7936	4.504403E-7
FBgn0038353	CG5399	CG5399	11.7484	6.7566043E-7
FBgn0034094	CG3666	Tsf3	11.265	4.504403E-7
FBgn0012042	CG10146	AttA	10.6701	1.373843E-4
FBgn0027538	CG8536	beta4GalNAcTA	10.4731	6.7566043E-7
FBgn0053126	CG33126	NLaz	10.4315	1.5765411E-6
FBgn0039342	CG5107	CG5107	10.2079	6.7566048E-6
FBgn0034913	CG11173	usnp	9.71784	6.7566043E-7
FBgn0027343	CG16785	fz3	9.17484	6.7566043E-7
FBgn0023523	CG3206	Or2a	8.94508	0.0014999661
FBgn0030985	CG15883	Obp18a	8.30816	1.1261008E-6
FBgn0028983	CG10913	Spn6	7.6246	2.2522015E-6
FBgn0054040	CG34040	CG34040	7.59942	6.689039E-5
FBgn0003358	CG31039	Jon99Ci	6.96463	6.576429E-5
FBgn0036765	CG7408	CG7408	6.52655	4.279183E-6
FBgn0037917	CG5344	wkd	6.37249	4.504403E-6
FBgn0002565	CG6806	Lsp2	6.35796	6.5313843E-6
FBgn0051104	CG31104	CG31104	6.30904	3.2792054E-4
FBgn0033134	CG12840	Tsp42El	6.30464	5.4052834E-6
FBgn0038660	CG14291	CG14291	6.20535	6.5313843E-6
FBgn0259481	CG11711	Mob2	6.17296	3.164343E-4
FBgn0030748	CG4394	Traf-like	6.04734	7.432265E-6
FBgn0010877	CG7129	l(3)05822	5.97792	7.432265E-6
FBgn0039471	CG6295	CG6295	5.79647	2.4076033E-4
FBgn0038149	CG9796	CG9796	5.76861	1.1711448E-5
FBgn0011705	CG9552	rost	5.7127	1.508975E-5
FBgn0050344	CG30344	CG30344	5.5865	1.1261008E-5
FBgn0028940	CG8864	Cyp28a5	5.57476	1.44140895E-5
FBgn0033725	CG8502	Cpr49Ac	5.54732	5.9007678E-5
FBgn0038752	CG4462	CG4462	5.53143	1.44140895E-5
FBgn0033132	CG12143	Tsp42Ej	5.52622	1.1035788E-5
FBgn0034985	CG3328	CG3328	5.48602	1.37384295E-5
FBgn0052056	CG32056	scramb1	5.47918	1.2387109E-5
FBgn0037013	CG13250	CG13250	5.30601	1.44140895E-5
FBgn0054026	CG34026	CG34026	5.26776	1.9977028E-4
FBgn0032839	CG10659	CG10659	5.26423	7.5876666E-4
FBgn0031936	CG13794	CG13794	5.166	1.7116732E-5
FBgn0024244	CG10016	drm	5.10731	1.8580662E-4
FBgn0001089	CG9092	Gal	5.10146	2.1621134E-5
FBgn0040503	CG7763	CG7763	5.01434	1.9053624E-4
FBgn0036419	CG13482	CG13482	4.9546	6.576429E-5
FBgn0032785	CG10026	CG10026	4.88081	2.6575977E-5
FBgn0004552	CG1171	Akh	4.85953	0.001415734
FBgn0038972	CG7054	CG7054	4.80681	2.8828179E-5
FBgn0034588	CG9394	CG9394	4.75113	6.9660594E-4
FBgn0039756	CG9743	CG9743	4.74415	3.3107364E-5
FBgn0062978	CG31808	CG31808	4.74193	2.4323777E-5
FBgn0037130	CG7152	Syn1	4.72606	2.6575977E-5
FBgn0038099	CG7091	CG7091	4.63707	2.7476859E-5
FBgn0030653	CG7860	CG7860	4.58	4.707101E-5
FBgn0020906	CG8867	Jon25Bi	4.53343	0.004286165
FBgn0034275	CG5002	CG5002	4.50864	7.252089E-5
FBgn0039308	CG11889	CG11889	4.45591	0.0011945677
FBgn0035726	CG9953	CG9953	4.44036	3.220648E-5
FBgn0001319	CG10197	kn	4.40746	4.0990068E-5
FBgn0041243	CG1712	Gr43a	4.40159	4.3467488E-5
FBgn0032140	CG13117	CG13117	4.34185	9.887164E-5
FBgn0026319	CG3048	Traf4	4.33795	5.1124975E-5
FBgn0037218	CG1107	aux	4.33694	4.3467488E-5
FBgn0085282	CG34253	CG34253	4.28811	5.0899755E-5
FBgn0034396	CG15097	CG15097	4.26507	4.8422335E-5
FBgn0038331	CG5073	CG5073	4.26397	5.5178938E-5
FBgn0052817	CG32817	CG32817	4.26072	4.594491E-5
FBgn0032036	CG13384	CG13384	4.231	4.7971895E-5
FBgn0035300	CG1139	CG1139	4.16674	0.0022418415
FBgn0038243	CG8066	CG8066	4.12683	6.328686E-5
FBgn0050089	CG30089	CG30089	4.09836	5.6530258E-5
FBgn0036485	CG6869	FucTA	3.99371	5.945812E-5
FBgn0259227	CG42327	CG42327	3.99201	6.328686E-5
FBgn0030079	CG7267	CG7267	3.98642	9.909687E-5
FBgn0036024	CG18180	CG18180	3.97748	0.0015006418
FBgn0033774	CG12374	CG12374	3.97589	0.0026922817
FBgn0034804	CG3831	CG3831	3.89469	1.21844096E-4
FBgn0004387	CG5658	Klp98A	3.86334	6.936781E-5
FBgn0032752	CG10702	CG10702	3.82007	2.101304E-4
FBgn0000183	CG6605	BicD	3.81194	8.4682775E-5
FBgn0025679	CG2932	Bteb2	3.79731	1.3715908E-4
FBgn0004425	CG1179	LysB	3.78313	0.0025627802
FBgn0029092	CG11804	ced-6	3.75336	1.12610076E-4
FBgn0039840	CG11340	CG11340	3.7412	0.0020465755
FBgn0038257	CG7390	smp-30	3.73767	0.0014866783
FBgn0028424	CG3767	JhI-26	3.7203	1.015743E-4
FBgn0040491	CG8238	Buffy	3.69252	1.4684354E-4
FBgn0261004	CG2919	asl	3.64336	1.3693386E-4
FBgn0037973	CG18547	CG18547	3.63897	0.0011143893
FBgn0036849	CG14079	CG14079	3.62724	1.3918606E-4
FBgn0003963	CG2762	ush	3.60369	1.3535732E-4
FBgn0263351	CG7057	AP-50	3.5925	1.2477196E-4
FBgn0000454	CG9285	Dip-B	3.58853	1.441409E-4
FBgn0000146	CG6137	aub	3.5721	1.6013153E-4
FBgn0038890	CG7956	CG7956	3.50503	1.8175265E-4
FBgn0052170	CG32170	CG32170	3.49937	1.5292448E-4
FBgn0031636	CG12194	CG12194	3.49626	1.8963536E-4
FBgn0032689	CG10413	CG10413	3.48147	1.8265353E-4
FBgn0035763	CG8602	CG8602	3.46366	1.4661833E-4
FBgn0013770	CG6692	Cp1	3.45682	1.6643769E-4
FBgn0086372	CG2520	lap	3.40753	1.8287876E-4
FBgn0034883	CG17664	CG17664	3.38201	2.882818E-4
FBgn0002931	CG11450	net	3.3747	0.012600391
FBgn0063494	CG17530	GstE6	3.31149	3.164343E-4
FBgn0261873	CG32717	sdt	3.29911	2.391838E-4
FBgn0052407	CG32407	CG32407	3.29878	2.2837325E-4
FBgn0015793	CG7062	Rab-RP3	3.29648	2.2837325E-4
FBgn0030373	CG12721	CG12721	3.26566	3.8760385E-4
FBgn0085437	CG34408	CG34408	3.2623	2.5607532E-4
FBgn0031832	CG9596	CG9596	3.21736	2.391838E-4
FBgn0263350	CG4260	alpha-Adaptin	3.21249	2.4098557E-4
FBgn0011655	CG1775	Med	3.18825	0.0092883045
FBgn0025682	CG9148	scf	3.16501	3.4008245E-4
FBgn0030791	CG9132	CG9132	3.1644	2.9346184E-4
FBgn0031728	CG7235	Hsp60C	3.07965	0.0010767776
FBgn0010380	CG12532	Bap	3.06492	3.542713E-4
FBgn0000079	CG18730	Amy-p	3.04402	4.089998E-4
FBgn0033786	CG3884	CG3884	3.03884	0.0011504246
FBgn0037012	CG4786	Rcd2	3.01961	5.107993E-4
FBgn0032209	CG18144	Hand	3.01278	3.186865E-4
FBgn0031732	CG11149	CG11149	2.99161	0.004744037
FBgn0034664	CG4377	CG4377	2.97255	0.0010333101
FBgn0011674	CG11312	insc	2.96985	5.177811E-4
FBgn0039553	CG5017	CG5017	2.96486	0.001638927
FBgn0051075	CG31075	CG31075	2.96086	3.97964E-4
FBgn0039098	CG13822	CG13822	2.95951	5.022409E-4
FBgn0002869	CG4312	MtnB	2.94296	0.0015407312
FBgn0027492	CG5643	wdb	2.93287	0.017107047
FBgn0031432	CG9964	Cyp309a1	2.91753	8.2993624E-4
FBgn0037985	CG14735	ssp5	2.89162	0.0017621224
FBgn0085317	CG34288	CG34288	2.88275	6.1732845E-4
FBgn0033222	CG12824	CG12824	2.86113	0.00191302
FBgn0036415	CG7768	CG7768	2.85918	0.0010256526
FBgn0035049	CG4859	Mmp1	2.85707	6.360217E-4
FBgn0034144	CG5089	CG5089	2.83662	0.0012279003
FBgn0085693	CG41562	CG41562	2.81305	0.0017450058
FBgn0014411	CG14804	Vps26	2.78927	5.94356E-4
FBgn0039685	CG7592	Obp99b	2.78475	0.0010625886
FBgn0052652	CG32652	CG32652	2.7839	0.0015245152
FBgn0261808	CG31299	cu	2.77643	6.553907E-4
FBgn0031751	CG9016	CG9016	2.76871	0.001233756
FBgn0042086	CG18816	Tsp42Eb	2.76813	0.0013567263
FBgn0035498	CG14991	Fit1	2.76575	7.166505E-4
FBgn0032840	CG13968	sNPF	2.76183	0.003172676
FBgn0085403	CG34374	Rapgap1	2.75018	7.380464E-4
FBgn0038979	CG7046	CG7046	2.74882	0.0022636878
FBgn0034434	CG9811	Rgk1	2.73097	0.0011641629
FBgn0033286	CG2127	CG2127	2.72725	0.0016632508
FBgn0004240	CG12763	Dpt	2.71824	0.0012062792
FBgn0000615	CG8994	exu	2.69423	0.0025312493
FBgn0004175	CG17935	Mst84Dd	2.68924	0.0016905024
FBgn0039310	CG11878	CG11878	2.68576	0.0048170085
FBgn0035476	CG12766	CG12766	2.68152	0.008098241
FBgn0031689	CG10833	Cyp28d1	2.67107	4.349001E-4
FBgn0038225	CG8489	soti	2.67031	0.0016742866
FBgn0027843	CG6906	CAH2	2.65068	0.004964753
FBgn0035444	CG12012	CG12012	2.63553	0.0010285804
FBgn0000633	CG17716	fas	2.62943	0.0017882481
FBgn0033792	CG13325	CG13325	2.62625	0.0048789443
FBgn0036110	CG18348	Cpr67Fb	2.62148	0.0033474471
FBgn0259685	CG6383	crb	2.61953	0.0013427625
FBgn0020251	CG8339	sfl	2.6184	7.4592914E-4
FBgn0002973	CG3779	numb	2.61837	5.43231E-4
FBgn0050377	CG30377	CG30377	2.6183	8.39846E-4
FBgn0005636	CG3385	nvy	2.61724	0.01199455
FBgn0031530	CG3254	pgant2	2.60331	0.0011535777
FBgn0002865	CG11719	Mst98Ca	2.602	0.0018634715
FBgn0001219	CG4264	Hsc70-4	2.60164	0.0013164118
FBgn0026570	CG5704	CG5704	2.58375	0.001209207
FBgn0263916	CG31911	Ent2	2.58246	9.4862725E-4
FBgn0037848	CG4591	Tsp86D	2.58216	6.4120174E-4
FBgn0028572	CG14039	qtc	2.57896	0.0011992973
FBgn0029736	CG4041	CG4041	2.57691	0.0020713499
FBgn0039494	CG5896	grass	2.57677	6.7566044E-4
FBgn0010341	CG12530	Cdc42	2.57524	0.0012407379
FBgn0031460	CG15399	CG15399	2.57506	6.675525E-4
FBgn0000163	CG5055	baz	2.57242	0.0016091979
FBgn0033954	CG12860	CG12860	2.5711	0.0018880205
FBgn0051820	CG31820	CG31820	2.56986	0.002831468
FBgn0051226	CG31226	CG31226	2.56943	0.0030420488
FBgn0062413	CG3977	Ctr1A	2.56827	8.975023E-4
FBgn0020620	CG8085	RN-tre	2.56325	0.0010819576
FBgn0028894	CG5869	CG5869	2.56304	0.001723835
FBgn0035020	CG13585	CG13585	2.56102	0.0010544808
FBgn0037939	CG14718	CG14718	2.55897	0.0029965541
FBgn0024179	CG10776	wit	2.55745	0.0011186685
FBgn0031633	CG2976	CG2976	2.5553	0.0011670908
FBgn0015541	CG5518	sda	2.55374	0.0010729488
FBgn0260946	CG6095	exo84	2.55129	0.0012047027
FBgn0034795	CG3695	MED23	2.54867	0.0011432174
FBgn0015222	CG2216	Fer1HCH	2.54484	0.0018452287
FBgn0015924	CG4280	crq	2.5357	6.981825E-4
FBgn0038261	CG14856	CG14856	2.53542	0.0011641629
FBgn0052364	CG32364	CG32364	2.53468	0.001327898
FBgn0040092	CG1652	lectin-46Cb	2.53379	0.0016733859
FBgn0031816	CG16947	CG16947	2.53293	0.0012963673
FBgn0023095	CG11282	caps	2.53046	8.846647E-4
FBgn0024814	CG6948	Clc	2.53032	3.8715344E-4
FBgn0022787	CG4261	Hel89B	2.51536	0.0012155132
FBgn0004171	CG18396	Mst98Cb	2.51268	0.0027762887
FBgn0010105	CG17943	comm	2.51024	6.918763E-4
FBgn0052595	CG32595	CG32595	2.50674	0.0021375646
FBgn0260745	CG3359	mfas	2.5035	0.0018069413
FBgn0037009	CG5104	CG5104	2.50271	7.781356E-4
FBgn0038373	CG4546	CG4546	2.50229	0.0035746943
FBgn0026313	CG5675	X11L	2.50197	0.0014175356
FBgn0086915	CG3354	Mst77F	2.50095	9.4705075E-4
FBgn0030245	CG1637	CG1637	2.49893	8.806108E-4
FBgn0038088	CG10126	CG10126	2.49893	8.4142253E-4
FBgn0042189	CG17376	CG17376	2.49877	0.0021161686
FBgn0039640	CG14516	CG14516	2.49616	0.0037282943
FBgn0028369	CG3653	kirre	2.49524	1.7792392E-5
FBgn0038330	CG14868	CG14868	2.4888	6.6552556E-4
FBgn0030893	CG7122	RhoGAP16F	2.48543	5.896264E-4
FBgn0032520	CG10859	CG10859	2.48398	0.003935947
FBgn0013272	CG5820	Gp150	2.48355	9.526812E-5
FBgn0015477	CG8014	Rme-8	2.48217	0.001182631
FBgn0261575	CG11909	tobi	2.48135	0.0016375757
FBgn0024245	CG17559	dnt	2.4795	0.0018693273
FBgn0003356	CG31034	Jon99Cii	2.47685	0.0015351006
FBgn0038248	CG7886	CG7886	2.47675	0.0041059884
FBgn0032889	CG9331	CG9331	2.47353	0.0014639309
FBgn0046294	CG12699	CG12699	2.47145	0.0010675435
FBgn0011823	CG4799	Pen	2.47024	6.9255196E-4
FBgn0033287	CG8701	CG8701	2.46938	0.002907367
FBgn0086907	CG13263	Cyt-c-d	2.46797	0.0033285285
FBgn0051948	CG31948	CG31948	2.46562	0.00409743
FBgn0051259	CG31259	CG31259	2.46253	2.7702079E-5
FBgn0003159	CG2841	ptr	2.46188	0.0019576135
FBgn0051288	CG31288	CG31288	2.45527	0.015837707
FBgn0036058	CG6707	CG6707	2.45174	0.0017148262
FBgn0033953	CG12861	CG12861	2.45132	0.0024242697
FBgn0015791	CG4212	Rab14	2.44992	0.0015418571
FBgn0031946	CG7164	CG7164	2.44965	0.004206662
FBgn0034085	CG18243	Ptp52F	2.44877	9.754285E-4
FBgn0038733	CG11407	CG11407	2.44717	0.00408189
FBgn0038404	CG8925	CG8925	2.44635	0.016258867
FBgn0030529	CG10997	Clic	2.43942	0.0015673069
FBgn0063667	CG32335	CG32335	2.43852	0.004251706
FBgn0026755	CG9481	Ugt37b1	2.43676	0.009432445
FBgn0086711	CG4482	mol	2.43636	0.0015429833
FBgn0052141	CG32141	CG32141	2.43542	0.0018774353
FBgn0051641	CG31641	stai	2.43089	8.8556565E-4
FBgn0003392	CG18102	shi	2.42755	0.0015853246
FBgn0038115	CG7966	CG7966	2.42742	0.0015022183
FBgn0036023	CG18179	CG18179	2.42535	0.0013143849
FBgn0032005	CG8282	Snx6	2.42392	9.824103E-4
FBgn0034543	CG30152	CG30152	2.42347	6.7566044E-4
FBgn0028870	CG4691	CG4691	2.42249	0.0033420417
FBgn0041102	CG7929	ocn	2.42198	0.0032636654
FBgn0041629	CG1787	Hexo2	2.42138	3.75442E-4
FBgn0033364	CG13747	CG13747	2.42028	0.004398324
FBgn0085382	CG34353	CG34353	2.41638	0.0022386883
FBgn0035678	CG10469	CG10469	2.41426	0.0015891533
FBgn0004921	CG8261	Ggamma1	2.41385	0.0014704624
FBgn0030993	CG7635	Mec2	2.41238	0.0039267135
FBgn0036066	CG14160	CG14160	2.4108	0.0036846017
FBgn0053192	CG33192	MtnD	2.40933	0.0042875158
FBgn0052758	CG32758	CG32758	2.40722	0.0018364452
FBgn0030218	CG1628	CG1628	2.40245	0.0023780996
FBgn0032269	CG7363	w-cup	2.40079	0.0040672505
FBgn0086377	CG5081	Syx7	2.39842	6.123736E-4
FBgn0037074	CG7324	CG7324	2.39657	0.0016643769
FBgn0003716	CG14026	tkv	2.39599	0.001963019
FBgn0032002	CG8353	CG8353	2.39545	0.004330758
FBgn0029881	CG3973	pigs	2.3903	0.0018907231
FBgn0035491	CG11591	Dpy-30L2	2.38149	0.004835927
FBgn0050285	CG30285	CG30285	2.37759	0.0036699623
FBgn0259225	CG42325	Pde1c	2.36945	0.0018821649
FBgn0262603	CG2095	sec8	2.36751	3.0922727E-4
FBgn0030035	CG11190	CG11190	2.36683	0.009710592
FBgn0001941	CG9078	ifc	2.36585	6.2543637E-4
FBgn0038978	CG7045	CG7045	2.36371	0.005002365
FBgn0015790	CG5771	Rab11	2.36191	0.0020055855
FBgn0034345	CG5174	CG5174	2.36129	0.0020400442
FBgn0036454	CG17839	CG17839	2.36083	0.0016758633
FBgn0004882	CG10868	orb	2.36015	0.004195176
FBgn0034142	CG8306	CG8306	2.36011	8.1372046E-4
FBgn0051740	CG31740	CG31740	2.35306	0.002497016
FBgn0000455	CG5663	Dip-C	2.35273	7.083174E-4
FBgn0031545	CG3213	CG3213	2.35177	0.0046654353
FBgn0028662	CG7007	VhaPPA1-1	2.34994	0.0024769714
FBgn0026374	CG8497	Rhp	2.34981	0.0036147835
FBgn0051674	CG31674	CG31674	2.34676	0.0024105313
FBgn0004174	CG17945	Mst84Dc	2.34649	0.0031278576
FBgn0039326	CG10562	CG10562	2.34383	0.0022591832
FBgn0030594	CG9509	CG9509	2.34143	0.01365172
FBgn0262733	CG7524	Src64B	2.33833	8.4367464E-4
FBgn0036752	CG5992	Adgf-A	2.33695	1.150875E-4
FBgn0001085	CG17697	fz	2.3358	0.0027686313
FBgn0259795	CG4750	loopin-1	2.33528	0.0024749443
FBgn0034467	CG15128	CG15128	2.32698	0.0046983175
FBgn0262742	CG6588	Fas1	2.32504	0.0019368933
FBgn0038909	CG6569	CG6569	2.32462	0.004224229
FBgn0052544	CG32544	CG32544	2.32055	0.0024967906
FBgn0027608	CG2082	CG2082	2.31997	0.0028668274
FBgn0053340	CG33340	CG33340	2.31716	0.0026873269
FBgn0035197	CG9130	CG9130	2.31632	0.0026684084
FBgn0034435	CG9975	CG9975	2.31522	0.00511475
FBgn0038598	CG7131	CG7131	2.31352	0.0021127902
FBgn0050011	CG30011	gem	2.31326	0.0024427378
FBgn0010241	CG8523	Mdr50	2.31269	0.014062521
FBgn0033551	CG7222	CG7222	2.31069	0.0020567104
FBgn0039104	CG10252	CG10252	2.30924	0.0038440574
FBgn0023000	CG6936	mth	2.30712	8.2227873E-4
FBgn0036144	CG6207	GlcAT-P	2.30672	0.0021540055
FBgn0037915	CG6790	CG6790	2.30555	0.0061867977
FBgn0025558	CG4101	CG4101	2.3055	0.0027294431
FBgn0034194	CG15611	CG15611	2.305	0.0029485822
FBgn0034400	CG15099	CG15099	2.30497	0.0022132383
FBgn0033696	CG8859	Cyp6g2	2.30476	0.006983176
FBgn0032775	CG17544	CG17544	2.30022	8.7385415E-4
FBgn0083972	CG34136	CG34136	2.29652	0.002841828
FBgn0037215	CG12582	CG12582	2.29022	0.0026195354
FBgn0031654	CG8869	Jon25Bii	2.28981	0.0305385
FBgn0035879	CG7112	CG7112	2.28727	0.002505349
FBgn0035704	CG10144	CG10144	2.2847	0.0025542218
FBgn0032514	CG9302	CG9302	2.28465	0.0024785479
FBgn0051777	CG31777	CG31777	2.27861	0.0030319137
FBgn0033353	CG13749	CG13749	2.27828	0.005021959
FBgn0050380	CG30380	CG30380	2.27604	0.0023373347
FBgn0012037	CG8827	Ance	2.27517	3.7161325E-4
FBgn0032668	CG17681	CG17681	2.27256	0.00310466
FBgn0004574	CG15811	Rop	2.27127	0.0024096305
FBgn0032637	CG5050	CG5050	2.26889	0.0069338526
FBgn0031859	CG17377	CG17377	2.26759	0.0038580212
FBgn0037606	CG8032	CG8032	2.26717	0.0022846332
FBgn0053301	CG33301	CG33301	2.26672	0.009429517
FBgn0028853	CG15263	CG15263	2.26377	0.0019657214
FBgn0035988	CG3982	CG3982	2.26344	0.005280512
FBgn0034691	CG6562	synj	2.26123	0.0026798944
FBgn0034117	CG7997	CG7997	2.25575	0.004705299
FBgn0031285	CG3662	CG3662	2.25374	8.729533E-4
FBgn0015663	CG2788	Dot	2.25213	0.0033724466
FBgn0027095	CG7013	Manf	2.2477	0.003062769
FBgn0037433	CG17919	CG17919	2.24261	0.0031864147
FBgn0020279	CG8715	lig	2.2409	0.0022753992
FBgn0026878	CG4325	CG4325	2.23946	0.0039413525
FBgn0011244	CG2830	Hsp60B	2.23056	0.0057809507
FBgn0000318	CG11024	cl	2.2293	0.0030406972
FBgn0036813	CG6877	Aut1	2.22904	0.0028515123
FBgn0052423	CG32423	shep	2.22521	0.0031003808
FBgn0031374	CG7337	CG7337	2.22444	0.0027075966
FBgn0035196	CG9129	CG9129	2.21708	0.007259071
FBgn0028699	CG7499	Rh50	2.21675	0.002686426
FBgn0019828	CG1980	dj	2.21474	0.005050562
FBgn0031724	CG18266	CG18266	2.21144	0.006131844
FBgn0051313	CG31313	CG31313	2.20926	0.0037150064
FBgn0040211	CG4779	hgo	2.20503	0.003668611
FBgn0085521	CG40813	CG40813	2.20428	0.006882728
FBgn0065032	CG8936	Arpc3B	2.20217	0.005864508
FBgn0035709	CG10124	eIF4E-4	2.20048	0.006701651
FBgn0050271	CG30271	CG30271	2.19991	0.008880882
FBgn0028523	CG5888	CG5888	2.19828	3.6598273E-4
FBgn0015772	CG10637	Nak	2.19758	0.0030810118
FBgn0030882	CG6835	GS	2.19494	0.004142474
FBgn0032900	CG14401	CG14401	2.19457	3.7611764E-5
FBgn0032360	CG14926	CG14926	2.19409	0.0064568366
FBgn0004629	CG8050	Cys	2.19296	0.0059728385
FBgn0033717	CG8839	CG8839	2.18814	0.003848562
FBgn0031937	CG13795	CG13795	2.18422	0.0036163602
FBgn0034013	CG8166	unc-5	2.17739	0.0029400238
FBgn0037759	CG8526	CG8526	2.17732	0.007187676
FBgn0040348	CG3703	CG3703	2.17712	0.0047271457
FBgn0035860	CG8023	eIF4E-3	2.17628	0.009202044
FBgn0027279	CG14616	l(1)G0196	2.17511	0.0029857438
FBgn0260475	CG30059	CG30059	2.17364	0.0044670166
FBgn0039129	CG5338	RpS19b	2.1727	0.009383798
FBgn0261064	CG8506	Rbsn-5	2.1669	0.0032165945
FBgn0017572	CG4083	Mo25	2.16603	0.003536407
FBgn0038607	CG7669	CG7669	2.16502	0.007075742
FBgn0063498	CG17523	GstE2	2.16372	0.0030979032
FBgn0029507	CG12846	Tsp42Ed	2.16208	0.006118556
FBgn0051495	CG31495	CG31495	2.1598	0.0035771718
FBgn0039714	CG7816	CG7816	2.15856	0.008641472
FBgn0003401	CG4735	shu	2.15768	0.004714984
FBgn0033483	CG12919	egr	2.15692	0.0037159075
FBgn0038957	CG7059	CG7059	2.15248	0.008343731
FBgn0050430	CG30430	CG30430	2.15104	0.004319047
FBgn0015520	CG10328	nonA-l	2.14965	0.0040740073
FBgn0035679	CG10467	CG10467	2.14952	0.0070192115
FBgn0031627	CG15630	CG15630	2.14754	0.003876264
FBgn0004892	CG3242	sob	2.1473	0.0063467035
FBgn0034850	CG9875	CG9875	2.14457	0.0077401414
FBgn0011672	CG3671	Mvl	2.14291	0.0068820524
FBgn0034221	CG10764	CG10764	2.13988	0.005341546
FBgn0033292	CG2110	Cyp4ad1	2.13895	0.0037395554
FBgn0034736	CG6018	CG6018	2.13671	7.30389E-4
FBgn0250845	CG1288	CG1288	2.13487	0.009492804
FBgn0029913	CG3044	Cht11	2.13408	0.0036870793
FBgn0040068	CG7893	vav	2.13394	0.00339114
FBgn0069354	CG17137	Porin2	2.13209	0.004741335
FBgn0024432	CG12363	Dlc90F	2.13123	0.0041429247
FBgn0261578	CG42688	CG42688	2.13113	0.0070881285
FBgn0032624	CG6304	CG6304	2.12388	0.008501611
FBgn0019947	CG18803	Psn	2.12173	0.0044821063
FBgn0036338	CG11253	CG11253	2.12048	0.009542803
FBgn0040308	CG1274	Jafrac2	2.1181	0.0047012456
FBgn0037222	CG14642	CG14642	2.11744	0.0079658115
FBgn0015591	CG13633	Ast	2.11694	0.018777505
FBgn0031129	CG1324	CG1324	2.11643	0.0047926847
FBgn0033542	CG12309	CG12309	2.11581	0.006825522
FBgn0004858	CG4220	elB	2.11493	0.0062199053
FBgn0050098	CG30098	CG30098	2.11345	0.0077135647
FBgn0034271	CG4996	CG4996	2.11197	0.003986847
FBgn0034416	CG15109	CG15109	2.11096	0.009864192
FBgn0040395	CG3981	Unc-76	2.10992	0.004636157
FBgn0005564	CG9262	Shal	2.10629	0.0043530553
FBgn0030536	CG11068	CG11068	2.10479	0.0073658247
FBgn0034840	CG3124	CG3124	2.10394	0.005956623
FBgn0067864	CG12021	Patj	2.10319	8.1011694E-4
FBgn0038208	CG14355	CG14355	2.09699	0.008238102
FBgn0000257	CG12230	car	2.09614	0.0041814377
FBgn0043070	CG15669	MESK2	2.09462	0.005398302
FBgn0036661	CG9705	CG9705	2.09405	0.0042708497
FBgn0011270	CG17645	Pglym87	2.0933	0.006125538
FBgn0004173	CG17934	Mst84Db	2.09275	0.0039109476
FBgn0045827	CG13245	CG13245	2.09035	0.0064048106
FBgn0002862	CG17956	Mst87F	2.08991	0.00653206
FBgn0036085	CG6527	CG6527	2.08987	0.008972321
FBgn0259173	CG42278	corn	2.0876	0.0063872435
FBgn0025693	CG11163	CG11163	2.08708	0.004639535
FBgn0027793	CG14787	CG14787	2.08628	0.0060694576
FBgn0035906	CG6673	CG6673	2.08565	0.004994482
FBgn0030105	CG15369	CG15369	2.08329	0.007729105
FBgn0004595	CG17228	pros	2.08327	1.2342064E-4
FBgn0010548	CG11140	Aldh-III	2.08152	0.0044294046
FBgn0023549	CG3456	Mct1	2.08103	0.0047555235
FBgn0004648	CG4122	svr	2.07953	0.0048474134
FBgn0036566	CG5284	ClC-c	2.07713	0.0042420216
FBgn0051915	CG31915	CG31915	2.07569	0.004846287
FBgn0259979	CG17337	CG17337	2.07487	0.004948312
FBgn0010246	CG9155	Myo61F	2.07283	0.013258485
FBgn0028562	CG17975	sut2	2.07106	0.026272383
FBgn0013718	CG33991	nuf	2.07057	0.0045032767
FBgn0031690	CG7742	CG7742	2.06759	0.009377041
FBgn0032281	CG17107	CG17107	2.06029	0.004462512
FBgn0015781	CG6009	P5cr	2.05702	0.005011824
FBgn0046332	CG31003	gskt	2.05273	0.009579514
FBgn0260746	CG3132	Ect3	2.05176	0.008463098
FBgn0053666	CG33666	CG33666	2.05125	0.010008108
FBgn0050093	CG30093	CG30093	2.05121	0.009405869
FBgn0029896	CG3168	CG3168	2.05072	7.657485E-6
FBgn0053669	CG33669	CG33669	2.04947	0.01086462
FBgn0035060	CG16932	Eps-15	2.04896	0.004912052
FBgn0040993	CG17325	CG17325	2.04859	0.008196662
FBgn0035375	CG2103	pgant6	2.04851	0.008051846
FBgn0038127	CG8476	CG8476	2.04602	0.00980023
FBgn0051232	CG31232	koko	2.04196	0.005936578
FBgn0032078	CG9520	C1GalTA	2.04167	0.0049345735
FBgn0050049	CG30049	CG30049	2.03739	0.024019053
FBgn0025628	CG4199	CG4199	2.03467	4.2769307E-4
FBgn0036857	CG9629	CG9629	2.03454	0.005279836
FBgn0261564	CG42678	CG42678	2.03309	0.0057971664
FBgn0030280	CG11106	CG11106	2.03282	0.011199072
FBgn0038539	CG12334	Atg8b	2.03121	0.009432445
FBgn0053664	CG33664	CG33664	2.03011	0.011463705
FBgn0029147	CG6698	NtR	2.02935	0.0054246527
FBgn0028567	CG1014	robl62A	2.02751	0.011461004
FBgn0032264	CG6113	Lip4	2.02741	0.007380239
FBgn0037724	CG9434	Fst	2.02719	0.019451814
FBgn0032139	CG13116	CG13116	2.02483	0.006366523
FBgn0033133	CG12841	Tsp42Ek	2.02434	0.0061210333
FBgn0011704	CG8975	RnrS	2.02267	0.0065345378
FBgn0035833	CG7565	CG7565	2.02209	0.0059039216
FBgn0036029	CG16719	CG16719	2.02021	0.0113510955
FBgn0032677	CG5790	CG5790	2.01948	0.010042792
FBgn0036571	CG12272	CG12272	2.01921	0.0059575234
FBgn0011771	CG5837	Hem	2.01892	0.00566271
FBgn0004049	CG9764	yrt	2.01795	0.0059620277
FBgn0261854	CG42783	aPKC	2.01652	0.0062849936
FBgn0033342	CG8258	CG8258	2.0149	0.006251886
FBgn0031418	CG3609	CG3609	2.0148	0.010037161
FBgn0033635	CG7777	CG7777	2.01366	0.0062431027
FBgn0039083	CG10177	CG10177	2.00712	0.011199072
FBgn0039777	CG2229	Jon99Fii	2.00527	0.0018916241
FBgn0034121	CG6262	CG6262	2.00501	0.011192991
FBgn0085197	CG34168	CG34168	2.00229	0.006232742
FBgn0032003	CG8349	CG8349	2.00132	0.012210535
FBgn0035434	CG10812	dro5	2.00024	0.00881264
FBgn0037518	CG2641	CG2641	1.9991	0.0067165154
FBgn0030697	CG8565	CG8565	1.99907	0.013589108
FBgn0040236	CG12132	c11,1	1.99832	#N/A
FBgn0262740	CG11727	CG11727	1.99445	0.007496903
FBgn0083984	CG34148	CG34148	1.99413	0.006532961
FBgn0032111	CG13110	CG13110	1.99325	0.011976758
FBgn0037135	CG7414	CG7414	1.99244	0.006670796
FBgn0051281	CG31281	Tpl94D	1.99123	0.012611652
FBgn0040285	CG9195	Scamp	1.98836	0.009894822
FBgn0037626	CG8236	CG8236	1.9875	0.0072131255
FBgn0039644	CG11897	CG11897	1.98678	0.0069144843
FBgn0034443	CG10460	cer	1.98409	0.007750951
FBgn0037636	CG9821	CG9821	1.98164	0.00685953
FBgn0033665	CG13189	CG13189	1.98056	0.009333123
FBgn0250862	CG42237	CG42237	1.97811	0.009880409
FBgn0030775	CG9673	CG9673	1.97794	0.006349857
FBgn0038347	CG18522	CG18522	1.97689	0.021015968
FBgn0030277	CG1394	CG1394	1.97575	0.005937028
FBgn0053494	CG33494	CG33494	1.97435	0.008719398
FBgn0035497	CG14995	CG14995	1.97286	0.013491588
FBgn0000114	CG31762	aret	1.97275	0.013019527
FBgn0039190	CG5762	CG5762	1.97233	0.010889845
FBgn0015039	CG4486	Cyp9b2	1.96912	0.021204703
FBgn0034708	CG5625	Vps35	1.96905	0.005840409
FBgn0034946	CG3065	CG3065	1.96421	0.00763699
FBgn0024997	CG2681	CG2681	1.9641	0.033006012
FBgn0011273	CG17769	And	1.96358	0.011779915
FBgn0031722	CG14011	CG14011	1.96194	0.010942771
FBgn0038878	CG3301	CG3301	1.96181	0.0066250763
FBgn0051361	CG31361	dpr17	1.96002	0.011946352
FBgn0027493	CG17273	CG17273	1.95276	0.0069347536
FBgn0053281	CG33281	CG33281	1.95115	0.007923695
FBgn0037186	CG11241	CG11241	1.95046	0.021370916
FBgn0001281	CG7931	janB	1.95029	0.013810726
FBgn0011817	CG7892	nmo	1.95006	0.0077052317
FBgn0001404	CG9659	egh	1.94762	0.010080629
FBgn0039444	CG14243	TwdlD	1.94663	0.0072665033
FBgn0037468	CG1943	CG1943	1.94588	0.012905114
FBgn0040963	CG18662	CG18662	1.94565	0.010141213
FBgn0004172	CG17946	Mst84Da	1.94489	0.0083043175
FBgn0031849	CG11327	CG11327	1.9448	0.011349744
FBgn0036422	CG3868	CG3868	1.94376	0.0046163374
FBgn0052446	CG32446	Atox1	1.94288	0.007420554
FBgn0039869	CG1890	CG1890	1.9426	0.011459201
FBgn0036579	CG5027	CG5027	1.94179	0.0069284476
FBgn0050462	CG9002	ste24c	1.94162	0.011426769
FBgn0038680	CG11821	Cyp12a5	1.94058	0.009481768
FBgn0051072	CG31072	Lerp	1.93791	0.011028131
FBgn0036833	CG3819	CG3819	1.9379	0.029897524
FBgn0038052	CG5538	CG5538	1.93752	0.012689579
FBgn0039511	CG3330	CG3330	1.93596	0.009749556
FBgn0034398	CG15098	CG15098	1.9359	0.010206076
FBgn0031923	CG13791	CG13791	1.93535	0.008150041
FBgn0052638	CG32638	CG32638	1.93339	0.011685547
FBgn0010223	CG12232	Galpha73B	1.93311	0.035858653
FBgn0039485	CG17189	CG17189	1.93246	0.007137452
FBgn0032721	CG10602	CG10602	1.93142	0.006896917
FBgn0038098	CG7381	CG7381	1.93127	0.003351501
FBgn0034184	CG9646	CG9646	1.92765	0.008998671
FBgn0019662	CG8593	qm	1.92715	0.007802527
FBgn0027103	CG6159	sec10	1.92616	0.0070293457
FBgn0011570	CG17158	cpb	1.92428	0.009861264
FBgn0031128	CG1338	hydra	1.92398	0.019150695
FBgn0038318	CG6236	CG6236	1.92359	0.007179568
FBgn0015371	CG11798	chn	1.92289	0.011019122
FBgn0020304	CG3365	drongo	1.92282	0.009427265
FBgn0038163	CG10841	CG10841	1.92275	0.014560934
FBgn0037464	CG1988	CG1988	1.92253	0.013898335
FBgn0261794	CG5594	kcc	1.92124	0.007225513
FBgn0005671	CG17369	Vha55	1.92042	0.008858584
FBgn0031143	CG1532	CG1532	1.9196	0.010070494
FBgn0030558	CG1461	CG1461	1.91955	0.008536969
FBgn0051363	CG31363	Jupiter	1.91855	4.1057632E-4
FBgn0047351	CG31468	CG31468	1.91555	0.0043854867
FBgn0040850	CG15210	CG15210	1.91489	0.014642688
FBgn0259214	CG42314	PMCA	1.91449	0.00877255
FBgn0051528	CG31528	CG31528	1.91431	0.015619469
FBgn0263241	CG33048	Mocs1	1.9143	0.019463075
FBgn0037183	CG14451	CG14451	1.90955	0.009909011
FBgn0030859	CG12990	CG12990	1.90922	0.028554762
FBgn0032131	CG3841	CG3841	1.90753	0.028440576
FBgn0027596	CG10249	CG10249	1.90742	0.011109659
FBgn0035189	CG9119	CG9119	1.90625	0.010962816
FBgn0050192	CG30192	CG30192	1.90309	0.012960969
FBgn0039474	CG6283	CG6283	1.90197	0.0013515461
FBgn0039770	CG15537	CG15537	1.90055	0.011320466
FBgn0037288	CG14661	CG14661	1.90052	0.0103119295
FBgn0030278	CG15200	CG15200	1.89756	0.010276571
FBgn0035136	CG6905	CG6905	1.89685	0.022670211
FBgn0031118	CG1412	RhoGAP19D	1.89646	0.009189658
FBgn0001137	CG17610	grk	1.89181	2.1193216E-4
FBgn0050376	CG30376	CG30376	1.89154	0.011746131
FBgn0030466	CG15744	CG15744	1.88866	0.009998198
FBgn0015221	CG1469	Fer2LCH	1.88614	0.012001531
FBgn0032266	CG18302	CG18302	1.88478	0.008653409
FBgn0045761	CG10618	CHKov1	1.88302	0.008749577
FBgn0261984	CG4583	Ire1	1.88073	0.009286052
FBgn0037217	CG14636	CG14636	1.88006	0.009556541
FBgn0040323	CG6895	GNBP1	1.88003	0.012481702
FBgn0028513	CG9254	CG9254	1.87849	0.013747439
FBgn0040238	CG6264	Best1	1.87715	0.011280151
FBgn0034105	CG7755	CG7755	1.87643	0.014685705
FBgn0038914	CG17820	fit	1.87452	0.0141012585
FBgn0039562	CG5520	Gp93	1.87365	0.011862795
FBgn0035142	CG17090	hipk	1.87359	0.010451341
FBgn0031108	CG15459	CG15459	1.87316	0.015615415
FBgn0013343	CG31136	Syx1A	1.87215	0.012238688
FBgn0033794	CG13326	CG13326	1.87106	0.01349812
FBgn0038706	CG3517	CG3517	1.87011	0.014992906
FBgn0010501	CG5370	Dcp-1	1.86873	0.013582126
FBgn0015756	CG6141	RpL9	1.86851	0.010278823
FBgn0039130	CG5854	CG5854	1.86242	0.011661674
FBgn0025865	CG3637	Cortactin	1.86214	0.009505867
FBgn0010385	CG1385	Def	1.86152	0.01855904
FBgn0031335	CG5565	CG5565	1.86106	0.009194387
FBgn0261534	CG7532	l(2)34Fc	1.85904	0.00988266
FBgn0032494	CG5945	CG5945	1.85692	0.010072296
FBgn0035047	CG3691	Pof	1.85691	0.019761942
FBgn0038804	CG10877	CG10877	1.85546	0.021326996
FBgn0034389	CG15078	Mctp	1.85503	0.013444518
FBgn0035776	CG8564	CG8564	1.85449	0.010807189
FBgn0050362	CG30362	boly	1.85401	0.015404382
FBgn0011693	CG4899	Pdh	1.85379	0.010690074
FBgn0051407	CG31407	CG31407	1.85086	0.017634062
FBgn0034692	CG13502	CG13502	1.85025	0.011400194
FBgn0035558	CG11357	CG11357	1.84949	0.01041936
FBgn0053460	CG33460	CG33460	1.84929	0.017629107
FBgn0032387	CG16965	CG16965	1.849	0.016123962
FBgn0033888	CG18568	CG18568	1.84866	0.016789036
FBgn0261362	CG42639	proPO-A1	1.84829	0.012790702
FBgn0030776	CG4653	CG4653	1.84644	0.017622577
FBgn0034247	CG6484	CG6484	1.8464	0.029487174
FBgn0050339	CG30339	CG30339	1.8459	0.04170379
FBgn0034914	CG5554	CG5554	1.84515	0.012899935
FBgn0086408	CG3622	stl	1.84439	0.029819824
FBgn0035287	CG13937	CG13937	1.84403	6.441296E-5
FBgn0031590	CG3702	CG3702	1.8437	0.010714623
FBgn0038345	CG5213	CG5213	1.84349	0.016104367
FBgn0011743	CG5409	Arp53D	1.84102	0.016944438
FBgn0026150	CG6291	ApepP	1.84057	0.011893876
FBgn0038260	CG14855	CG14855	1.83986	0.011470238
FBgn0034824	CG3219	Klp59C	1.83961	0.015646718
FBgn0051788	CG31788	CG31788	1.83896	0.009939416
FBgn0062517	CG16984	CG16984	1.83891	0.019397985
FBgn0260442	CG6831	rhea	1.83691	0.010252021
FBgn0024236	CG6817	foi	1.83626	0.012517962
FBgn0036191	CG7334	Sug	1.83608	0.010611473
FBgn0250825	CG34241	CG34241	1.83524	0.019993242
FBgn0030749	CG9968	Anxb11	1.83501	0.011853562
FBgn0039203	CG13618	CG13618	1.83501	0.029801581
FBgn0029947	CG1999	CG1999	1.83343	0.015703024
FBgn0260761	CG42559	CG42559	1.83286	0.01693115
FBgn0013334	CG8884	Sap47	1.83263	0.014356433
FBgn0050039	CG30039	CG30039	1.83242	0.016991735
FBgn0035724	CG10064	CG10064	1.83152	0.013790229
FBgn0026059	CG31045	Mhcl	1.83148	0.015826896
FBgn0016693	CG6148	Past1	1.82962	5.148533E-4
FBgn0047338	CG32148	CG32148	1.82924	0.01737686
FBgn0051802	CG31802	CG31802	1.8292	0.010498637
FBgn0034470	CG11218	Obp56d	1.82867	0.010524537
FBgn0051546	CG31546	CG31546	1.82835	0.018563997
FBgn0036465	CG11552	Rpn12R	1.82788	0.020242337
FBgn0034356	CG10924	CG10924	1.82681	0.01090561
FBgn0033402	CG2078	Myd88	1.82669	0.017775951
FBgn0051036	CG31036	CG31036	1.82644	0.013461184
FBgn0039315	CG13658	CG13658	1.82635	0.035740864
FBgn0028847	CG9014	CG9014	1.8258	0.018532917
FBgn0039136	CG5902	CG5902	1.82445	0.010927231
FBgn0034127	CG7848	CG7848	1.82312	0.0129161505
FBgn0036778	CG5137	Cyp312a1	1.82298	0.026258418
FBgn0026141	CG5450	Cdlc2	1.82237	0.015086597
FBgn0046225	CG17230	CG17230	1.81948	0.012957366
FBgn0038000	CG10014	CG10014	1.81934	0.021688474
FBgn0085483	CG34454	CG34454	1.81862	0.014185041
FBgn0037283	CG14658	CG14658	1.81835	0.014106664
FBgn0000042	CG4027	Act5C	1.81754	0.017262224
FBgn0029724	CG15472	CG15472	1.81743	0.01101867
FBgn0028473	CG8801	CG8801	1.80979	0.013202855
FBgn0261531	CG42659	CG42659	1.80888	0.01694534
FBgn0250849	CG32388	CG32388	1.8072	0.011776762
FBgn0040349	CG3699	CG3699	1.80672	0.019503614
FBgn0031490	CG17264	CG17264	1.8054	0.020931736
FBgn0035023	CG13586	itp	1.80535	0.015885679
FBgn0050394	CG30394	CG30394	1.80506	0.011835544
FBgn0034263	CG10934	CG10934	1.80477	0.019571858
FBgn0033443	CG1698	CG1698	1.80434	1.37384295E-5
FBgn0039530	CG5586	Tusp	1.80403	0.012304228
FBgn0027509	CG7261	CG7261	1.80365	0.01455868
FBgn0030332	CG9360	CG9360	1.80271	0.01831175
FBgn0052473	CG32473	CG32473	1.79684	7.2791154E-4
FBgn0035499	CG14996	Chd64	1.79683	0.016987005
FBgn0259101	CG42249	CG42249	1.79618	0.0282854
FBgn0052436	CG32436	CG32436	1.79495	0.017248485
FBgn0003557	CG4244	Su(dx)	1.79361	0.017777303
FBgn0040382	CG5273	CG5273	1.79353	0.013989325
FBgn0025111	CG1683	Ant2	1.79288	0.024794938
FBgn0039071	CG4434	CG4434	1.79133	0.021414382
FBgn0259834	CG8062	out	1.79043	0.019200018
FBgn0030485	CG1998	CG1998	1.78912	0.01335015
FBgn0037470	CG1091	CG1091	1.78749	0.013296547
FBgn0250848	CG8947	26-29-p	1.78747	0.012283282
FBgn0038359	CG5614	CG5614	1.78682	0.019004302
FBgn0031661	CG8890	Gmd	1.78665	0.01383595
FBgn0035495	CG14989	CG14989	1.78577	0.022668634
FBgn0085223	CG34194	CG34194	1.78384	0.015915183
FBgn0051988	CG31988	CG31988	1.78324	0.010710569
FBgn0038109	CG11656	CG11656	1.78231	0.02029121
FBgn0035236	CG12004	CG12004	1.78157	0.015764285
FBgn0014010	CG3664	Rab5	1.78146	0.013086642
FBgn0035356	CG16986	CG16986	1.78072	0.03952929
FBgn0010504	CG11546	kermit	1.78064	0.02576361
FBgn0064766	CG7600	CG7600	1.78005	0.014390442
FBgn0035568	CG18418	CG18418	1.77948	0.018222788
FBgn0015795	CG5915	Rab7	1.77737	0.0155496495
FBgn0004181	CG2668	Peb	1.77653	0.024392696
FBgn0040763	CG18336	CG18336	1.77636	0.026206166
FBgn0039858	CG11525	CycG	1.77634	0.014338866
FBgn0037897	CG5270	CG5270	1.77609	0.014438414
FBgn0034659	CG4021	CG4021	1.7751	0.020628138
FBgn0032530	CG9263	CG9263	1.77487	0.0198982
FBgn0035161	CG13898	CG13898	1.77367	0.019475013
FBgn0035772	CG8582	Sh3beta	1.77346	0.016320353
FBgn0032120	CG33298	CG33298	1.77302	0.013297223
FBgn0038420	CG10311	CG10311	1.77237	0.015854148
FBgn0000416	CG12070	Sap-r	1.7717	0.0131339375
FBgn0037206	CG12768	CG12768	1.76958	0.014024233
FBgn0033544	CG7220	CG7220	1.76909	0.028103646
FBgn0031574	CG3964	CG3964	1.76868	0.01878674
FBgn0259171	CG42276	Pde9	1.76821	0.014597645
FBgn0031905	CG5155	CG5155	1.76711	0.022933718
FBgn0051721	CG31721	Trim9	1.76695	0.018197788
FBgn0035985	CG3672	Cpr67B	1.76678	0.021303799
FBgn0026084	CG4944	cib	1.76676	0.019216234
FBgn0034705	CG11170	CG11170	1.7667	0.01647598
FBgn0039081	CG4370	Irk2	1.76599	0.045082543
FBgn0040777	CG14767	CG14767	1.76567	0.015364519
FBgn0038236	CG3360	Cyp313a1	1.76561	0.017511766
FBgn0036921	CG7823	RhoGDI	1.76374	0.015444246
FBgn0259212	CG42312	cno	1.7629	1.9594154E-5
FBgn0032061	CG9314	CG9314	1.76287	0.021358304
FBgn0051538	CG31538	CG31538	1.76276	0.010346839
FBgn0038856	CG7034	sec15	1.76275	0.014480979
FBgn0039010	CG4907	CG4907	1.76241	0.021574514
FBgn0014075	CG6850	Ugt	1.76232	0.013611856
FBgn0030469	CG15745	CG15745	1.762	0.02579987
FBgn0029608	CG3091	CG3091	1.76052	0.017459067
FBgn0029859	CG15892	CG15892	1.75982	0.02416477
FBgn0029753	CG4198	CG4198	1.75902	0.017740142
FBgn0011715	CG1064	Snr1	1.75769	0.015453256
FBgn0043575	CG14745	PGRP-SC2	1.75715	0.010589401
FBgn0026563	CG1979	CG1979	1.75685	0.018787188
FBgn0262511	CG8048	Vha44	1.75636	0.01578523
FBgn0046878	CG15582	Obp83cd	1.75602	0.01850634
FBgn0261477	CG5186	slim	1.75583	0.014695615
FBgn0053178	CG33178	CG33178	1.75549	0.016973266
FBgn0034352	CG17669	CG17669	1.75529	0.039894596
FBgn0046114	CG4919	Gclm	1.75475	0.018636517
FBgn0261502	CG42650	CG42650	1.75443	0.019251818
FBgn0004368	CG6899	Ptp4E	1.75278	0.02398347
FBgn0032372	CG4988	CG4988	1.75152	0.015590189
FBgn0051644	CG31644	CG31644	1.75019	0.023158262
FBgn0032371	CG4983	CG4983	1.74977	0.018791243
FBgn0025836	CG40494	RhoGAP1A	1.74862	0.017088354
FBgn0030141	CG3002	Gga	1.74836	0.017084075
FBgn0037035	CG10589	CG10589	1.74808	0.024376929
FBgn0040519	CG15219	CG15219	1.74799	0.0075432984
FBgn0032117	CG4435	FucTB	1.74783	0.018524133
FBgn0031585	CG2955	CG2955	1.7473	0.023734825
FBgn0036493	CG7255	CG7255	1.74711	0.020846827
FBgn0034186	CG8950	CG8950	1.74178	0.018102521
FBgn0002641	CG1692	mal	1.7417	0.023035968
FBgn0000636	CG5803	Fas3	1.7415	0.022444539
FBgn0031944	CG7196	CG7196	1.74097	0.023750592
FBgn0032702	CG10376	CG10376	1.74061	0.019303618
FBgn0037671	CG8444	VhaM8,9	1.73971	#N/A
FBgn0052174	CG32174	CG32174	1.73943	0.017016958
FBgn0030247	CG15208	CG15208	1.73809	0.018398684
FBgn0032971	CG6691	ttm3	1.73723	0.02181077
FBgn0033236	CG14764	CG14764	1.73424	0.018983131
FBgn0026056	CG11622	Rlip	1.73375	0.016030045
FBgn0260458	CG33717	PGRP-LD	1.73375	0.015792888
FBgn0033996	CG11807	CG11807	1.73275	0.015928019
FBgn0032378	CG14939	CycY	1.73153	0.01688025
FBgn0039792	CG2267	CG2267	1.7313	0.02423256
FBgn0043535	CG30141	Obp57a	1.73006	0.01939213
FBgn0014469	CG2060	Cyp4e2	1.73005	0.018122565
FBgn0024150	CG10564	Ac78C	1.72782	0.01863359
FBgn0034907	CG5539	CG5539	1.72677	0.022428548
FBgn0029946	CG15034	CG15034	1.72649	0.015856398
FBgn0043792	CG30427	CG30427	1.72595	0.0222254
FBgn0261461	CG42274	RhoGAP18B	1.72561	0.02720817
FBgn0013301	CG4478	Mst35Bb	1.725	0.012571113
FBgn0061197	CG13164	SIP2	1.72355	0.021743655
FBgn0031878	CG9188	sip2	1.72355	0.021743655
FBgn0033863	CG13337	CG13337	1.72297	0.023653295
FBgn0003475	CG10076	spir	1.72267	0.02583095
FBgn0033639	CG9003	CG9003	1.72158	0.028030675
FBgn0052299	CG32299	CG32299	1.72128	0.023990225
FBgn0032946	CG8663	nrv3	1.72056	0.020845477
FBgn0063492	CG17533	GstE8	1.72054	0.023423573
FBgn0039754	CG9747	CG9747	1.7192	0.027610416
FBgn0036341	CG11278	Syx13	1.71815	0.02253688
FBgn0260464	CG9288	CG9288	1.71747	0.017950272
FBgn0034032	CG8195	CG8195	1.71664	0.017332943
FBgn0030286	CG1657	CG1657	1.71578	0.017438347
FBgn0034374	CG15086	CG15086	1.71561	0.027251188
FBgn0051530	CG31530	CG31530	1.71492	0.018613094
FBgn0036443	CG13471	CG13471	1.71434	0.03012342
FBgn0038849	CG7079	CG7079	1.71335	0.018348236
FBgn0045038	CG7105	Proct	1.71333	0.020357424
FBgn0029752	CG3315	TrxT	1.71319	0.023737753
FBgn0034367	CG5341	sec6	1.71285	0.01776086
FBgn0030688	CG8952	CG8952	1.71229	0.029924328
FBgn0021995	CG2173	Rs1	1.71222	0.020394811
FBgn0040371	CG12470	CG12470	1.70827	0.026283417
FBgn0259701	CG42355	CG42355	1.70775	0.028486071
FBgn0013300	CG4479	Mst35Ba	1.7075	0.017623702
FBgn0035390	CG1893	scramb2	1.70735	0.017286997
FBgn0033609	CG13213	fbl6	1.70729	0.031916622
FBgn0052819	CG32819	CG32819	1.70714	0.02911894
FBgn0036687	CG6652	CG6652	1.70648	0.02393302
FBgn0261551	CG42669	CG42669	1.70602	0.0353411
FBgn0036895	CG9392	CG9392	1.70576	0.027332943
FBgn0039323	CG10559	CG10559	1.70551	0.04285962
FBgn0026309	CG5032	aft	1.70472	0.01931443
FBgn0035005	CG3483	CG3483	1.70396	0.025050787
FBgn0027561	CG18659	CG18659	1.70385	0.022968402
FBgn0053145	CG33145	CG33145	1.70294	0.02134524
FBgn0260960	CG3971	Baldspot	1.70284	0.02250017
FBgn0030799	CG4872	CG4872	1.70119	0.031104479
FBgn0261274	CG1333	Ero1L	1.70052	0.02257607
FBgn0063493	CG17531	GstE7	1.7001	0.03228058
FBgn0051793	CG31793	CG31793	1.69959	0.020305624
FBgn0040697	CG18676	Teh3	1.69953	0.021785544
FBgn0034390	CG15093	CG15093	1.69941	0.02636247
FBgn0259916	CG42445	CG42445	1.69688	0.030870026
FBgn0003091	CG6622	Pkc53E	1.69682	0.020635346
FBgn0033412	CG13955	CG13955	1.69625	0.07015788
FBgn0026063	CG17216	KP78b	1.69623	0.02144141
FBgn0032419	CG17217	CG17217	1.69618	0.026161347
FBgn0035218	CG9173	CG9173	1.69601	0.021683296
FBgn0032755	CG17344	CG17344	1.6951	0.016565619
FBgn0035470	CG14980	CG14980	1.69369	0.019664872
FBgn0028841	CG17330	jhamt	1.69322	0.016028242
FBgn0025186	CG5709	ari-2	1.69282	0.01965271
FBgn0027081	CG5353	Aats-thr	1.69271	0.020618454
FBgn0037086	CG7202	CG7202	1.69233	0.026773045
FBgn0031424	CG9887	VGlut	1.69213	0.026141077
FBgn0031799	CG9493	Pez	1.69176	0.023258036
FBgn0003884	CG1913	alphaTub84B	1.69117	0.023195876
FBgn0023515	CG14814	CG14814	1.69015	0.020830613
FBgn0033322	CG8584	CG8584	1.68967	0.02630594
FBgn0040992	CG10570	CG10570	1.68879	0.024388865
FBgn0039131	CG12268	CG12268	1.68869	0.041148398
FBgn0032124	CG17855	CG17855	1.68864	9.4705075E-4
FBgn0028379	CG7919	fan	1.68748	0.030261707
FBgn0051445	CG31445	CG31445	1.68577	0.023320194
FBgn0030086	CG7033	CG7033	1.68551	0.025505055
FBgn0002968	CG1634	Nrg	1.6854	0.028312199
FBgn0034480	CG16898	CG16898	1.68395	0.026907502
FBgn0035782	CG14835	CG14835	1.68314	0.027291277
FBgn0039827	CG1544	CG1544	1.68304	0.01962771
FBgn0031568	CG10019	CG10019	1.68279	0.019973425
FBgn0035146	CG13893	CG13893	1.68251	0.049506992
FBgn0038853	CG3421	RhoGAP93B	1.6825	0.020015765
FBgn0032588	CG5968	CG5968	1.68207	0.030230626
FBgn0033875	CG6357	CG6357	1.68171	0.028173465
FBgn0039528	CG5634	dsd	1.68123	0.031608295
FBgn0033901	CG12366	O-fut1	1.68121	0.019593028
FBgn0032276	CG17098	CG17098	1.68117	0.029760366
FBgn0004828	CG8989	His3,3B	1.68117	#N/A
FBgn0004244	CG10537	Rdl	1.68009	0.02734488
FBgn0032895	CG9335	CG9335	1.67908	0.023404652
FBgn0260743	CG18347	CG18347	1.67891	0.023268621
FBgn0259975	CG42485	Sfp87B	1.67885	0.030093016
FBgn0039927	CG11155	CG11155	1.67742	0.02424157
FBgn0014342	CG10390	mia	1.67702	0.027933605
FBgn0036769	CG5492	Tsp74F	1.67694	0.030769128
FBgn0053265	CG33265	Muc68E	1.67628	0.051496137
FBgn0039208	CG6643	Esyt2	1.6762	0.022324948
FBgn0033259	CG11210	CG11210	1.67583	0.025423525
FBgn0031012	CG8051	CG8051	1.6757	0.029338304
FBgn0042185	CG18769	CG18769	1.67409	0.024111392
FBgn0035901	CG6745	CG6745	1.67351	0.021140965
FBgn0015245	CG12101	Hsp60	1.67276	0.020656066
FBgn0039373	CG5024	CG5024	1.6724	0.030576339
FBgn0010269	CG15793	Dsor1	1.67239	0.026355712
FBgn0027592	CG4184	MED15	1.67135	0.020832865
FBgn0030376	CG2750	CG2750	1.67064	0.030054502
FBgn0262002	CG42820	CG42820	1.67048	0.0290534
FBgn0020653	CG2151	Trxr-1	1.6703	0.022909844
FBgn0031085	CG9570	CG9570	1.66996	0.03122317
FBgn0050412	CG30412	CG30412	1.66826	0.0291811
FBgn0030994	CG14193	CG14193	1.66815	0.029837392
FBgn0001942	CG9075	eIF-4a	1.66812	0.021644108
FBgn0038966	CG13848	pinta	1.66797	0.026415171
FBgn0051199	CG31199	CG31199	1.66788	0.021797257
FBgn0003969	CG9209	vap	1.66774	0.026882503
FBgn0002524	CG4162	lace	1.66745	0.026895564
FBgn0031381	CG7291	Npc2a	1.66737	0.022400621
FBgn0040941	CG15308	CG15308	1.66717	2.4999437E-5
FBgn0263006	CG3725	Ca-P60A	1.66714	0.021619784
FBgn0001105	CG10545	Gbeta13F	1.66712	0.023382355
FBgn0260748	CG5004	CG5004	1.66666	0.031313032
FBgn0015754	CG8440	Lis-1	1.66567	0.02360217
FBgn0037535	CG14463	CG14463	1.66559	0.027196461
FBgn0086450	CG2194	su(r)	1.66463	0.042184185
FBgn0027588	CG14476	CG14476	1.66271	0.021344788
FBgn0031089	CG9572	CG9572	1.65821	0.025268573
FBgn0036372	CG10083	CG10083	1.65803	0.02565618
FBgn0085433	CG34404	CG34404	1.65777	2.693633E-4
FBgn0035445	CG12014	CG12014	1.65775	0.03180244
FBgn0027569	CG7207	cert	1.6569	0.027894642
FBgn0035620	CG5150	CG5150	1.65595	0.04808743
FBgn0037739	CG12948	CG12948	1.65585	0.023979414
FBgn0027790	CG12023	GV1	1.65513	0.02754983
FBgn0260461	CG14098	Rcd7	1.65496	0.02686426
FBgn0037881	CG10703	CG10703	1.65426	0.022108061
FBgn0001332	CG10109	L	1.65197	0.030279497
FBgn0033377	CG8073	Pmm45A	1.65164	0.0238096
FBgn0031458	CG2855	aph-1	1.65076	0.027873246
FBgn0035892	CG7127	exo70	1.65018	0.0251929
FBgn0034278	CG14488	CG14488	1.64982	0.030420484
FBgn0034529	CG16742	CG16742	1.64935	0.02327042
FBgn0038053	CG18549	CG18549	1.64786	0.025411816
FBgn0021764	CG5227	sdk	1.64773	0.02482962
FBgn0033705	CG13168	CG13168	1.64627	0.023783924
FBgn0020908	CG15848	Scp1	1.64608	0.03674129
FBgn0036741	CG7510	CG7510	1.64479	0.02358663
FBgn0030040	CG15347	CG15347	1.64469	0.031093668
FBgn0032409	CG5336	Ced-12	1.64458	0.024398774
FBgn0053303	CG33303	CG33303	1.64448	0.0272138
FBgn0036359	CG14105	CG14105	1.64409	0.034649894
FBgn0015286	CG2849	Rala	1.64368	0.03323236
FBgn0023388	CG1099	Dap160	1.6435	5.954821E-4
FBgn0030603	CG5541	CG5541	1.64345	0.025775995
FBgn0040805	CG12355	CG12355	1.6433	0.028109277
FBgn0000253	CG8472	Cam	1.64287	0.027087903
FBgn0040694	CG14974	CG14974	1.64242	0.027251188
FBgn0036369	CG10089	CG10089	1.64196	0.029715097
FBgn0037571	CG11694	CG11694	1.6419	0.031776987
FBgn0041630	CG1318	Hexo1	1.64163	0.033635955
FBgn0050487	CG30487	CG30487	1.64085	0.03237765
FBgn0030082	CG7041	HP1b	1.63983	0.026643995
FBgn0025742	CG9115	mtm	1.63972	0.025422402
FBgn0039930	CG11077	CG11077	1.63848	0.030412378
FBgn0036239	CG5684	Pop2	1.63813	0.027242178
FBgn0039075	CG4393	CG4393	1.6374	0.025409337
FBgn0019948	CG3832	Phm	1.63671	0.032790925
FBgn0051204	CG31204	CG31204	1.63614	0.033770185
FBgn0052486	CG32486	CG32486	1.63466	0.02777122
FBgn0036805	CG4108	Chmp1	1.63463	0.033463437
FBgn0261563	CG42677	wb	1.6327	2.2522015E-7
FBgn0029725	CG2871	CG2871	1.63248	0.031592757
FBgn0035852	CG7387	CG7387	1.6301	0.034055088
FBgn0032069	CG9468	CG9468	1.63001	0.043595415
FBgn0051779	CG31779	Acp24A4	1.6297	0.034223776
FBgn0038369	CG4560	Arpc3A	1.62923	0.028984258
FBgn0038504	CG5407	Sur-8	1.62897	0.02735051
FBgn0032424	CG17010	CG17010	1.62844	0.024696518
FBgn0034495	CG11788	CG11788	1.62701	0.023765905
FBgn0250844	CG4218	CG4218	1.62662	0.029827707
FBgn0030078	CG10970	CG10970	1.62612	0.033049032
FBgn0051999	CG31999	CG31999	1.62549	0.026148962
FBgn0035380	CG9970	CG9970	1.62469	0.031012814
FBgn0021872	CG9415	Xbp1	1.62424	0.027680684
FBgn0035730	CG17744	CG17744	1.62387	0.037324835
FBgn0033524	CG18377	Cyp49a1	1.6238	0.026175085
FBgn0003117	CG3978	pnr	1.62369	0.027647575
FBgn0034483	CG16894	CG16894	1.62319	0.036902547
FBgn0031996	CG8460	CG8460	1.62315	0.02645098
FBgn0040814	CG14113	CG14113	1.62104	0.040249094
FBgn0022786	CG12153	Hira	1.62082	0.03319002
FBgn0030313	CG11697	CG11697	1.62054	0.035541993
FBgn0031091	CG9576	CG9576	1.61973	0.03179343
FBgn0038039	CG5196	CG5196	1.61967	0.027539246
FBgn0262125	CG1250	sec23	1.61905	0.024638183
FBgn0038704	CG5316	CG5316	1.61902	0.040318463
FBgn0051735	CG31735	CG31735	1.61889	0.037468076
FBgn0039733	CG11504	CG11504	1.61867	0.03296052
FBgn0039135	CG13603	CG13603	1.61861	0.029083578
FBgn0033873	CG6337	CG6337	1.61829	0.027768517
FBgn0036771	CG14353	CG14353	1.61777	0.035981398
FBgn0033610	CG18335	CG18335	1.61734	0.04425306
FBgn0013305	CG3798	Nmda1	1.61722	0.034210492
FBgn0032405	CG14946	CG14946	1.61701	0.037465822
FBgn0011694	CG2665	PebII	1.61628	0.029991442
FBgn0028399	CG4672	TMS1	1.61623	0.027611315
FBgn0039472	CG17192	CG17192	1.61591	0.07990293
FBgn0010226	CG8938	GstS1	1.61519	0.03492016
FBgn0030943	CG6540	CG6540	1.61447	0.031183532
FBgn0043471	CG12388	kappaTry	1.61332	0.027837662
FBgn0259818	CG42399	CG42399	1.61319	0.02877345
FBgn0051798	CG31798	CG31798	1.61301	0.029911038
FBgn0031061	CG14232	CG14232	1.61248	0.038049817
FBgn0029826	CG6041	CG6041	1.61192	0.048282698
FBgn0032191	CG5734	CG5734	1.61159	0.027623927
FBgn0051619	CG31619	CG31619	1.61131	0.03806108
FBgn0020910	CG4863	RpL3	1.61101	0.036704578
FBgn0085233	CG34204	CG34204	1.61101	0.034302603
FBgn0033238	CG11165	CG11165	1.61079	0.03502196
FBgn0003890	CG4869	betaTub97EF	1.61079	0.028232474
FBgn0020270	CG16928	mre11	1.61041	0.034796286
FBgn0036723	CG12229	CG12229	1.60998	0.031412356
FBgn0033266	CG2160	Socs44A	1.60992	0.033601493
FBgn0039694	CG7615	fig	1.60976	0.04138533
FBgn0033221	CG12825	CG12825	1.60874	0.049886037
FBgn0051120	CG31120	CG31120	1.6082	0.034706652
FBgn0032864	CG2493	CG2493	1.60818	0.029284926
FBgn0031850	CG11326	Tsp	1.60758	0.032675166
FBgn0037616	CG8136	CG8136	1.60705	0.040905386
FBgn0053704	CG33704	CG33704	1.60609	0.043005336
FBgn0032880	CG9318	CG9318	1.60479	0.028892592
FBgn0261570	CG42684	CG42684	1.60474	0.034557782
FBgn0086475	CG3885	sec3	1.60424	0.032323822
FBgn0051683	CG31683	CG31683	1.60395	0.038039684
FBgn0038952	CG7069	CG7069	1.60348	0.032017972
FBgn0052483	CG32483	CG32483	1.60312	0.08712011
FBgn0050369	CG30369	CG30369	1.60254	0.03409045
FBgn0037766	CG12806	Teh1	1.60223	0.061075427
FBgn0035251	CG7967	CG7967	1.60166	0.03323146
FBgn0039669	CG2014	CG2014	1.60064	0.035801895
FBgn0027948	CG5000	msps	1.60005	0.040525664
FBgn0003514	CG3595	sqh	1.6	0.038196888
FBgn0026430	CG3917	Grip84	1.59929	0.03650458
FBgn0033574	CG7722	Spn47C	1.59862	0.05069593
FBgn0002121	CG2671	l(2)gl	1.59833	0.039953154
FBgn0030343	CG1886	ATP7	1.59745	0.030211257
FBgn0037541	CG2747	CG2747	1.59688	0.026557285
FBgn0037705	CG9381	mura	1.59616	0.03269341
FBgn0054054	CG34054	CG34054	1.59606	0.04451296
FBgn0032068	CG9466	CG9466	1.59536	0.043802164
FBgn0014133	CG1822	bif	1.59497	0.04151686
FBgn0050088	CG30088	CG30088	1.59452	0.03832121
FBgn0031155	CG15446	CG15446	1.59447	0.041028578
FBgn0036738	CG7542	CG7542	1.59437	0.03173645
FBgn0037486	CG14605	CG14605	1.59404	0.038977727
FBgn0028968	CG1528	gammaCop	1.59325	0.030329498
FBgn0000442	CG3324	Pkg21D	1.59303	0.042771332
FBgn0024833	CG9388	AP-47	1.59289	0.03360825
FBgn0037203	CG11128	slif	1.59287	0.040489405
FBgn0020312	CG4050	CG4050	1.59247	0.03284543
FBgn0053346	CG33346	CG33346	1.59155	0.021890048
FBgn0037521	CG2993	CG2993	1.59142	0.030261932
FBgn0035480	CG14984	CG14984	1.59133	0.025907524
FBgn0037910	CG14708	CG14708	1.59048	0.0503786
FBgn0037679	CG8866	CG8866	1.59009	0.03146483
FBgn0051473	CG31473	CG31473	1.58979	0.045627125
FBgn0041004	CG17715	CG17715	1.58892	0.03272043
FBgn0040651	CG15458	CG15458	1.58862	0.039476365
FBgn0030770	CG13010	CG13010	1.58784	0.040436927
FBgn0037045	CG10584	CG10584	1.58747	0.038065586
FBgn0027296	CG3073	l(1)G0144	1.58729	0.034277607
FBgn0036654	CG9692	CG9692	1.58602	0.05082341
FBgn0040256	CG6633	Ugt86Dd	1.58582	0.07804937
FBgn0035715	CG10103	CG10103	1.58545	0.04318236
FBgn0042180	CG18870	CG18870	1.58509	0.03296142
FBgn0031157	CG1503	CG1503	1.58501	0.04923898
FBgn0038826	CG17838	CG17838	1.58495	0.04034301
FBgn0260634	CG10192	eIF4G2	1.5847	0.036947817
FBgn0031529	CG9662	CG9662	1.58462	0.033101056
FBgn0036483	CG12316	CG12316	1.58418	0.045427807
FBgn0035003	CG15873	CG15873	1.58377	0.044099234
FBgn0002578	CG8342	m1	1.5828	0.041950632
FBgn0034713	CG11291	CG11291	1.58279	0.03393955
FBgn0030319	CG2533	CG2533	1.58274	0.043134388
FBgn0259729	CG42383	CG42383	1.58235	0.035948742
FBgn0028671	CG1709	Vha100-1	1.58223	0.030862818
FBgn0032477	CG5287	CG5287	1.58203	0.035807528
FBgn0031201	CG12446	CG12446	1.58123	0.06598455
FBgn0050416	CG30416	CG30416	1.58068	0.04088827
FBgn0037697	CG9363	CG9363	1.58062	0.04315984
FBgn0052081	CG32081	CG32081	1.5804	0.035272405
FBgn0038921	CG6332	CG6332	1.58014	0.048223235
FBgn0033330	CG8746	CG8746	1.57919	0.034853045
FBgn0031090	CG9575	Rab35	1.57884	0.037894867
FBgn0020238	CG31196	14-3-3epsilon	1.57861	0.034994256
FBgn0051347	CG31347	CG31347	1.57829	0.03441251
FBgn0034577	CG10540	cpa	1.57816	0.037875272
FBgn0016930	CG4551	smi35A	1.57794	5.7318533E-4
FBgn0053503	CG33503	Cyp12d1-d	1.57785	0.036284994
FBgn0015778	CG9412	rin	1.57748	0.041391186
FBgn0045468	CG31335	Gr93d	1.57736	0.04192248
FBgn0030038	CG1440	CG1440	1.57735	0.035178937
FBgn0030334	CG4139	Karl	1.57692	0.03472084
FBgn0036962	CG17122	CG17122	1.57689	0.041808292
FBgn0028401	CG9474	Snap24	1.57688	0.040734895
FBgn0031476	CG8813	CG8813	1.5764	0.034047883
FBgn0259739	CG42393	CG42393	1.57632	0.036635663
FBgn0032882	CG9320	ns4	1.57631	0.031899508
FBgn0033234	CG8791	CG8791	1.57614	0.09457422
FBgn0038349	CG6045	CG6045	1.5751	0.04914912
FBgn0036824	CG3902	CG3902	1.57438	0.042664353
FBgn0014861	CG7538	Mcm2	1.57436	0.04186257
FBgn0029824	CG3726	CG3726	1.5741	0.04396072
FBgn0028941	CG16853	CG16853	1.57385	0.040540304
FBgn0032811	CG10268	CG10268	1.57331	0.03659557
FBgn0000108	CG7727	Appl	1.57291	0.042853538
FBgn0025681	CG3558	CG3558	1.57254	0.038205445
FBgn0026721	CG6953	fat-spondin	1.57235	0.033726268
FBgn0032859	CG10954	Arc-p34	1.57169	0.0399241
FBgn0037350	CG2911	CG2911	1.57151	0.036235895
FBgn0052450	CG32450	CG32450	1.57093	0.02551429
FBgn0035151	CG17129	CG17129	1.5707	0.035753924
FBgn0031450	CG2903	Hrs	1.57049	0.041587126
FBgn0000578	CG15112	ena	1.57002	0.034863405
FBgn0051206	CG31206	CG31206	1.57001	0.034722414
FBgn0004687	CG3201	Mlc-c	1.56994	0.039849326
FBgn0025692	CG3814	CG3814	1.56993	0.022180356
FBgn0000422	CG10697	Ddc	1.56924	0.048422784
FBgn0051870	CG31870	CG31870	1.56839	0.03031013
FBgn0031388	CG12674	CG12674	1.56767	0.060952682
FBgn0003517	CG14792	sta	1.56752	0.04835049
FBgn0015035	CG4105	Cyp4e3	1.56742	0.035873294
FBgn0005585	CG9429	Crc	1.56698	0.034867458
FBgn0051174	CG31174	CG31174	1.56686	0.03654197
FBgn0033283	CG11635	CG11635	1.5659	0.043774914
FBgn0034350	CG5189	CG5189	1.56498	0.03383122
FBgn0030191	CG15306	CG15306	1.56475	0.04586924
FBgn0034133	CG7813	CG7813	1.56414	0.045851443
FBgn0033285	CG18449	CG18449	1.56392	0.02642418
FBgn0020371	CG15257	Tim17b2	1.56274	0.040106304
FBgn0083959	CG34123	trpm	1.56246	0.043094974
FBgn0037460	CG15178	sowi	1.56223	0.040644582
FBgn0031723	CG7251	CG7251	1.56223	0.04409653
FBgn0261552	CG42670	ps	1.56206	0.04334294
FBgn0032253	CG5322	CG5322	1.56182	0.036362246
FBgn0036729	CG13733	CG13733	1.56129	0.044632554
FBgn0036099	CG11811	CG11811	1.56083	0.03389338
FBgn0003887	CG9277	betaTub56D	1.56058	0.03866557
FBgn0011661	CG10701	Moe	1.56053	0.04201617
FBgn0030976	CG7378	CG7378	1.56049	0.044425126
FBgn0038179	CG9312	CG9312	1.56038	0.04603162
FBgn0037514	CG10919	CG10919	1.56035	0.048758812
FBgn0035855	CG7366	CG7366	1.56033	0.04120065
FBgn0051787	CG31787	CG31787	1.56019	0.04207473
FBgn0036663	CG9674	CG9674	1.56001	0.04319137
FBgn0004362	CG17950	HmgD	1.55997	0.051950403
FBgn0027356	CG8604	Amph	1.55984	0.035602577
FBgn0031284	CG3876	CG3876	1.55983	0.041033536
FBgn0031817	CG9531	CG9531	1.55958	0.042351075
FBgn0031495	CG17257	GABPI	1.55935	0.037484966
FBgn0051460	CG31460	CG31460	1.55934	0.040962365
FBgn0043799	CG31381	CG31381	1.55922	0.03707709
FBgn0032474	CG9828	DnaJ-H	1.55909	0.038245086
FBgn0037950	CG14723	HisCl1	1.55889	0.03834711
FBgn0039544	CG12877	CG12877	1.55879	0.03722056
FBgn0028394	CG17834	CG17834	1.55838	0.064065225
FBgn0024194	CG11495	rasp	1.55736	0.039663747
FBgn0033020	CG10396	CG10396	1.55679	0.048723005
FBgn0004919	CG2679	gol	1.55656	0.044183917
FBgn0034474	CG13873	Obp56g	1.55608	0.035041552
FBgn0030814	CG4955	CG4955	1.55554	0.04925655
FBgn0035267	CG13921	CG13921	1.55553	0.037661765
FBgn0050183	CG30183	CG30183	1.55518	0.04556744
FBgn0034419	CG15111	CG15111	1.55478	0.040764622
FBgn0020272	CG1424	mst	1.55476	0.066382065
FBgn0260861	CG9298	Trs23	1.55435	0.047046687
FBgn0011829	CG14396	Ret	1.554	0.04757145
FBgn0030276	CG1938	Dlic	1.55342	0.042623814
FBgn0036832	CG18223	CG18223	1.55277	0.044279184
FBgn0000256	CG3399	capu	1.5527	0.051420685
FBgn0039723	CG15522	CG15522	1.55254	0.035680503
FBgn0027505	CG7061	rab3-GAP	1.55174	0.05536452
FBgn0046873	CG31483	Pif2	1.55161	0.03965136
FBgn0036365	CG10732	CG10732	1.55092	0.03695705
FBgn0034860	CG9812	CG9812	1.55089	0.04458233
FBgn0031566	CG2818	CG2818	1.55073	0.03871039
FBgn0015019	CG8977	Cctgamma	1.55063	0.04701831
FBgn0032907	CG9272	CG9272	1.55028	0.052334856
FBgn0003124	CG12306	polo	1.55012	0.042856466
FBgn0263598	CG3762	Vha68-2	1.55002	0.04903133
FBgn0039776	CG31022	PH4alphaEFB	1.55001	0.03917907
FBgn0001248	CG7176	Idh	1.54997	0.034838177
FBgn0030499	CG11178	CG11178	1.54981	0.039073218
FBgn0038123	CG8508	CG8508	1.54946	0.047226638
FBgn0032519	CG16957	CG16957	1.549	0.045451228
FBgn0085199	CG34170	CG34170	1.54894	0.04476836
FBgn0032563	CG15258	CG15258	1.54874	0.050464176
FBgn0030530	CG11063	jub	1.548	0.0486971
FBgn0035273	CG12020	CG12020	1.54796	0.0394874
FBgn0030752	CG9947	CG9947	1.54704	0.046312474
FBgn0037702	CG8176	CG8176	1.54654	0.03213531
FBgn0025383	CG14780	CG14780	1.54649	0.044378728
FBgn0033624	CG12384	CG12384	1.54638	0.04454832
FBgn0032259	CG6144	CG6144	1.5462	0.03879327
FBgn0036992	CG11796	CG11796	1.54598	0.055589512
FBgn0034145	CG5065	CG5065	1.54596	0.043162316
FBgn0032817	CG10631	CG10631	1.54571	0.042630795
FBgn0032446	CG5780	CG5780	1.54559	0.03967726
FBgn0044323	CG7392	Cka	1.54513	0.041077454
FBgn0038656	CG14294	CG14294	1.54512	0.043604422
FBgn0086604	CG12484	CG12484	1.54448	0.046439268
FBgn0026372	CG7977	RpL23A	1.54438	0.04990608
FBgn0031886	CG8902	Nuf2	1.54415	0.04447805
FBgn0036659	CG9701	CG9701	1.54402	0.05055787
FBgn0038842	CG5630	CG5630	1.54398	0.050013963
FBgn0262737	CG7437	mub	1.54382	0.041896578
FBgn0031170	CG1718	CG1718	1.54377	0.038382016
FBgn0026192	CG5884	par-6	1.54323	0.04173442
FBgn0016754	CG13598	sba	1.54293	0.04737078
FBgn0016756	CG5486	Ubp64E	1.54274	0.04149929
FBgn0034089	CG8446	CG8446	1.54249	0.047020562
FBgn0035957	CG5144	CG5144	1.54235	0.055472173
FBgn0051626	CG31626	CG31626	1.54224	0.055647396
FBgn0261445	CG10072	sgl	1.5422	0.061955582
FBgn0039861	CG1800	pasha	1.54187	0.04044999
FBgn0004657	CG1560	mys	1.54162	0.041884866
FBgn0030675	CG8191	CG8191	1.5416	0.048006125
FBgn0027453	CG6627	Dnz1	1.54088	0.042672914
FBgn0032869	CG17470	CG17470	1.54074	0.035780277
FBgn0036537	CG18081	CG18081	1.54072	0.041774508
FBgn0000043	CG12051	Act42A	1.53963	0.050139636
FBgn0031971	CG7224	CG7224	1.53918	0.0488766
FBgn0040905	CG15578	CG15578	1.53855	0.05295196
FBgn0010423	CG9073	TpnC47D	1.53832	0.047162905
FBgn0038206	CG3172	twf	1.53786	0.0483631
FBgn0030955	CG6891	CG6891	1.53691	0.043559153
FBgn0036075	CG8065	CG8065	1.53643	0.04950181
FBgn0050432	CG30432	CG30432	1.53631	0.05593613
FBgn0053116	CG33116	CG33116	1.53608	0.046005495
FBgn0029932	CG4607	CG4607	1.5359	0.08185649
FBgn0038058	CG5608	CG5608	1.53575	0.04401252
FBgn0000083	CG5730	AnnIX	1.53551	0.05036936
FBgn0051809	CG31809	CG31809	1.53533	0.080282874
FBgn0044020	CG8998	Roc2	1.53516	0.055102814
FBgn0037962	CG6971	CG6971	1.53511	0.055507537
FBgn0032577	CG13244	CG13244	1.53457	0.047368526
FBgn0034745	CG4329	CG4329	1.53405	0.052980337
FBgn0031281	CG3883	Saf6	1.53395	0.042941377
FBgn0052396	CG32396	CG32396	1.53354	0.046805024
FBgn0015324	CG1088	Vha26	1.53293	0.04769803
FBgn0026143	CG3658	CDC45L	1.53138	0.0449598
FBgn0037828	CG14690	tomboy20	1.53129	0.04794892
FBgn0259982	CG15266	l(2)35Cc	1.53128	0.049636267
FBgn0024189	CG33141	sns	1.53125	1.6621247E-4
FBgn0004868	CG4422	Gdi	1.53098	0.047461096
FBgn0029750	CG3323	CG3323	1.53095	0.059734017
FBgn0026787	CG12178	Nhe1	1.5308	0.040784217
FBgn0052806	CG32806	CG32806	1.53062	0.044271078
FBgn0032433	CG5427	Oatp33Ea	1.52997	0.047126416
FBgn0085442	CG34413	NKAIN	1.52994	0.04701313
FBgn0038892	CG15498	CG15498	1.52971	0.046305716
FBgn0051606	CG31606	CG31606	1.5295	0.055010248
FBgn0033663	CG8983	ERp60	1.52927	0.03811671
FBgn0037164	CG11438	CG11438	1.52923	0.06261661
FBgn0029903	CG4532	pod1	1.52922	0.04835364
FBgn0037609	CG9773	CG9773	1.52901	0.043721538
FBgn0038445	CG14891	CG14891	1.52877	0.042944077
FBgn0037554	CG7602	DNApol-iota	1.52866	0.082720436
FBgn0061435	CG30270	CG30270	1.52835	0.05193509
FBgn0036442	CG13473	CG13473	1.52793	0.047115155
FBgn0039665	CG2310	CG2310	1.52769	0.056558635
FBgn0052462	CG32462	CG32462	1.52725	0.052350845
FBgn0051231	CG31231	CG31231	1.5271	0.045981623
FBgn0039707	CG15510	CG15510	1.52647	0.06085313
FBgn0039421	CG6036	CG6036	1.52637	0.04620932
FBgn0037900	CG5276	CG5276	1.52623	0.05384541
FBgn0037432	CG10298	CG10298	1.52593	0.06867165
FBgn0037758	CG9467	CG9467	1.52592	0.048300717
FBgn0085405	CG34376	CG34376	1.52554	0.069242135
FBgn0028970	CG18627	betaggt-II	1.52547	0.050140765
FBgn0027558	CG4445	pgant3	1.52536	0.048181575
FBgn0261041	CG12295	stj	1.52505	0.03695525
FBgn0003660	CG12210	Syb	1.52497	0.051072948
FBgn0013765	CG4832	cnn	1.52446	0.04903696
FBgn0261456	CG11228	hpo	1.52421	0.044237968
FBgn0034461	CG15124	CG15124	1.52382	0.04383122
FBgn0039589	CG9986	CG9986	1.52355	3.5810004E-5
FBgn0029167	CG7002	Hml	1.52332	0.04220333
FBgn0039491	CG6059	CG6059	1.52314	0.04727258
FBgn0036091	CG18628	CG18628	1.52285	0.02682417
FBgn0039234	CG7012	nct	1.52276	0.05093489
FBgn0021796	CG5092	Tor	1.52244	0.041462354
FBgn0030722	CG12395	CG12395	1.52228	0.062842056
FBgn0038533	CG7523	CG7523	1.5221	0.050309904
FBgn0052365	CG32365	CG32365	1.52194	0.037944417
FBgn0033275	CG14756	CG14756	1.5218	0.0555001
FBgn0052686	CG32686	CG32686	1.52177	0.04885498
FBgn0034054	CG8366	CG8366	1.52167	0.047269206
FBgn0030283	CG15198	CG15198	1.52105	0.05101912
FBgn0039799	CG15543	CG15543	1.5208	0.05275602
FBgn0030398	CG2555	Cpr11B	1.52079	0.04154794
FBgn0031195	CG17600	CG17600	1.52072	0.056544226
FBgn0050293	CG30293	Cht12	1.52064	0.058233596
FBgn0086736	CG5169	GckIII	1.52025	0.048551157
FBgn0085237	CG34208	CG34208	1.51991	0.04329722
FBgn0033051	CG7863	dream	1.51983	0.04094525
FBgn0034957	CG3121	CG3121	1.51978	0.04845431
FBgn0037084	CG7736	Syx6	1.5195	0.053447895
FBgn0038432	CG14883	CG14883	1.51932	0.05040585
FBgn0030224	CG12637	CG12637	1.51925	0.055389296
FBgn0038959	CG13856	CG13856	1.51907	0.040596608
FBgn0039088	CG10164	CG10164	1.51905	0.04297313
FBgn0051300	CG31300	CG31300	1.51897	0.059459023
FBgn0001104	CG10060	G-ialpha65A	1.51872	0.05871197
FBgn0036421	CG13481	CG13481	1.51857	0.0520486
FBgn0031954	CG14537	CG14537	1.51789	0.053336635
FBgn0050083	CG30083	CG30083	1.51749	0.05224207
FBgn0032816	CG10447	Nf-YB	1.51747	0.049047995
FBgn0037354	CG12171	CG12171	1.517	0.06362154
FBgn0052280	CG32280	CG32280	1.51642	0.046872817
FBgn0037870	CG18577	CG18577	1.51579	0.06891556
FBgn0024986	CG3719	CG3719	1.51563	0.05438076
FBgn0039820	CG15554	CG15554	1.51561	0.060972724
FBgn0037022	CG11396	CG11396	1.5155	0.049599785
FBgn0033088	CG3271	CG3271	1.51542	0.054485936
FBgn0260454	CG17139	CG17139	1.51522	0.051452447
FBgn0027581	CG6191	CG6191	1.51509	0.054439537
FBgn0039483	CG14259	CG14259	1.51474	0.048270307
FBgn0050443	CG30443	Opbp	1.51453	0.052076757
FBgn0002939	CG31783	ninaD	1.51448	0.040093016
FBgn0259978	CG8390	vlc	1.51429	0.052797236
FBgn0037632	CG8351	Tcp-1eta	1.51427	0.045660008
FBgn0035217	CG9169	FucTD	1.51404	0.053004436
FBgn0263832	CG1135	Rcd5	1.5139	0.053550594
FBgn0037987	CG14739	CG14739	1.51359	0.04691088
FBgn0053100	CG33100	4EHP	1.51331	0.05234837
FBgn0011606	CG8590	Klp3A	1.51314	0.052035313
FBgn0085256	CG34227	CG34227	1.51277	0.0696982
FBgn0030600	CG32592	hiw	1.51249	0.092511654
FBgn0037315	CG16708	Cerk	1.51244	0.045679376
FBgn0037063	CG9391	CG9391	1.5123	0.043835048
FBgn0035945	CG5026	CG5026	1.51198	0.054303285
FBgn0036014	CG3222	CG3222	1.51196	0.052667506
FBgn0013988	CG18255	Strn-Mlck	1.51185	0.056905698
FBgn0036927	CG7433	CG7433	1.51165	0.051062588
FBgn0035481	CG12605	CG12605	1.51135	0.06576023
FBgn0031781	CG5972	Arc-p20	1.51111	0.055183217
FBgn0042104	CG18747	CG18747	1.51096	0.06999054
FBgn0021847	CG8325	l(2)k14710	1.51088	0.049365554
FBgn0030936	CG6481	CG6481	1.51063	0.0441936
FBgn0050429	CG30429	CG30429	1.51063	0.059257902
FBgn0037472	CG10098	CG10098	1.51007	0.045580503
FBgn0030797	CG13004	CG13004	1.51001	0.06147587
FBgn0026402	CG8980	NiPp1	1.50994	0.05522713
FBgn0015359	CG2034	CG2034	1.50987	0.0458305
FBgn0046999	CG6429	CG6429	1.50969	0.044910926
FBgn0035092	CG3441	Nplp1	1.5096	0.04595167
FBgn0023458	CG3585	Rbcn-3A	1.50951	0.056478456
FBgn0067102	CG6437	GlcT-1	1.50939	0.048192836
FBgn0050356	CG30356	CG30356	1.50928	0.05629738
FBgn0052687	CG32687	CG32687	1.50885	0.059777707
FBgn0035312	CG15820	CG15820	1.50877	0.045231413
FBgn0037502	CG10113	wa-cup	1.5082	0.04400644
FBgn0038993	CG13843	CG13843	1.50801	0.059990093
FBgn0024273	CG1520	WASp	1.50783	0.051728114
FBgn0036309	CG10971	Hip1	1.50699	0.0535033
FBgn0050466	CG30466	CG30466	1.50663	0.055746265
FBgn0038213	CG9624	CG9624	1.50644	0.053842254
FBgn0028848	CG7311	CG7311	1.50636	0.04602464
FBgn0015949	CG9854	hrg	1.50546	0.06408797
FBgn0053555	CG33555	btsz	1.50512	0.0655688
FBgn0004401	CG6143	Pep	1.5051	0.059876356
FBgn0029128	CG17131	tyn	1.50481	0.048618723
FBgn0032495	CG16820	CG16820	1.50479	0.07870273
FBgn0037463	CG1984	djl	1.50471	0.040105175
FBgn0035421	CG12034	CG12034	1.50435	0.05235017
FBgn0033755	CG8594	ClC-b	1.50359	0.055929597
FBgn0037443	CG1021	CG1021	1.50339	0.05156393
FBgn0023169	CG3051	SNF1A	1.50324	0.05468796
FBgn0030164	CG1889	CG1889	1.50274	0.05367469
FBgn0038357	CG5623	CG5623	1.50261	0.036878224
FBgn0033212	CG1399	CG1399	1.50227	0.051476546
FBgn0038476	CG5175	kuk	1.5022	0.054517463
FBgn0052803	CG32803	CG32803	1.50196	0.054725792
FBgn0028741	CG6355	fab1	1.50194	0.051295243
FBgn0030230	CG11556	Rph	1.50136	0.041955136
FBgn0037794	CG6254	CG6254	1.50124	0.051228352
FBgn0031127	CG1835	CG1835	1.50065	0.05202923
FBgn0264078	CG32593	Flo-2	1.50055	0.058740567
FBgn0031145	CG1740	Ntf-2	1.50047	0.052081935
FBgn0051646	CG31646	CG31646	1.50036	0.045871716
